# Supplementary material for: Synthesis, characterization, and in vitro evaluation of two synergistic anticancer drug-containing hepatoma-targeting micelles formed from amphiphilic random copolymer
Source: Royal Society of Chemistry journal article supplement (doi:10.1039/c3bm60027k), 2013-01-01
Supplement: c3bm60027k.pdf [file c3bm60027k.pdf]

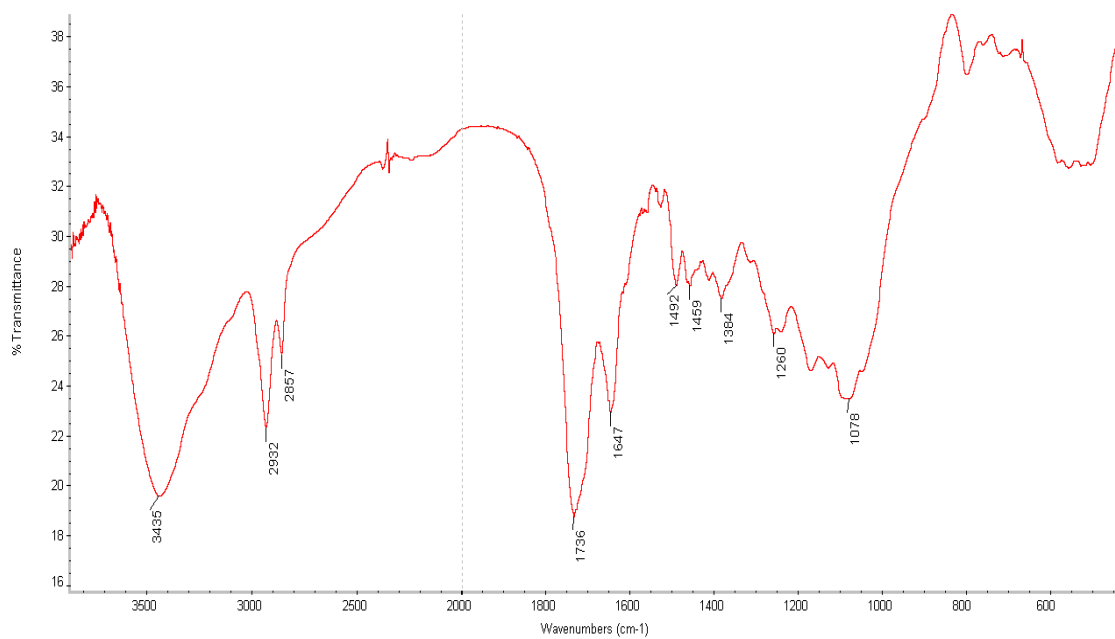

**Fig. S1** FTIR spectrum for poly (VAF-co-VSC-co-VGA)

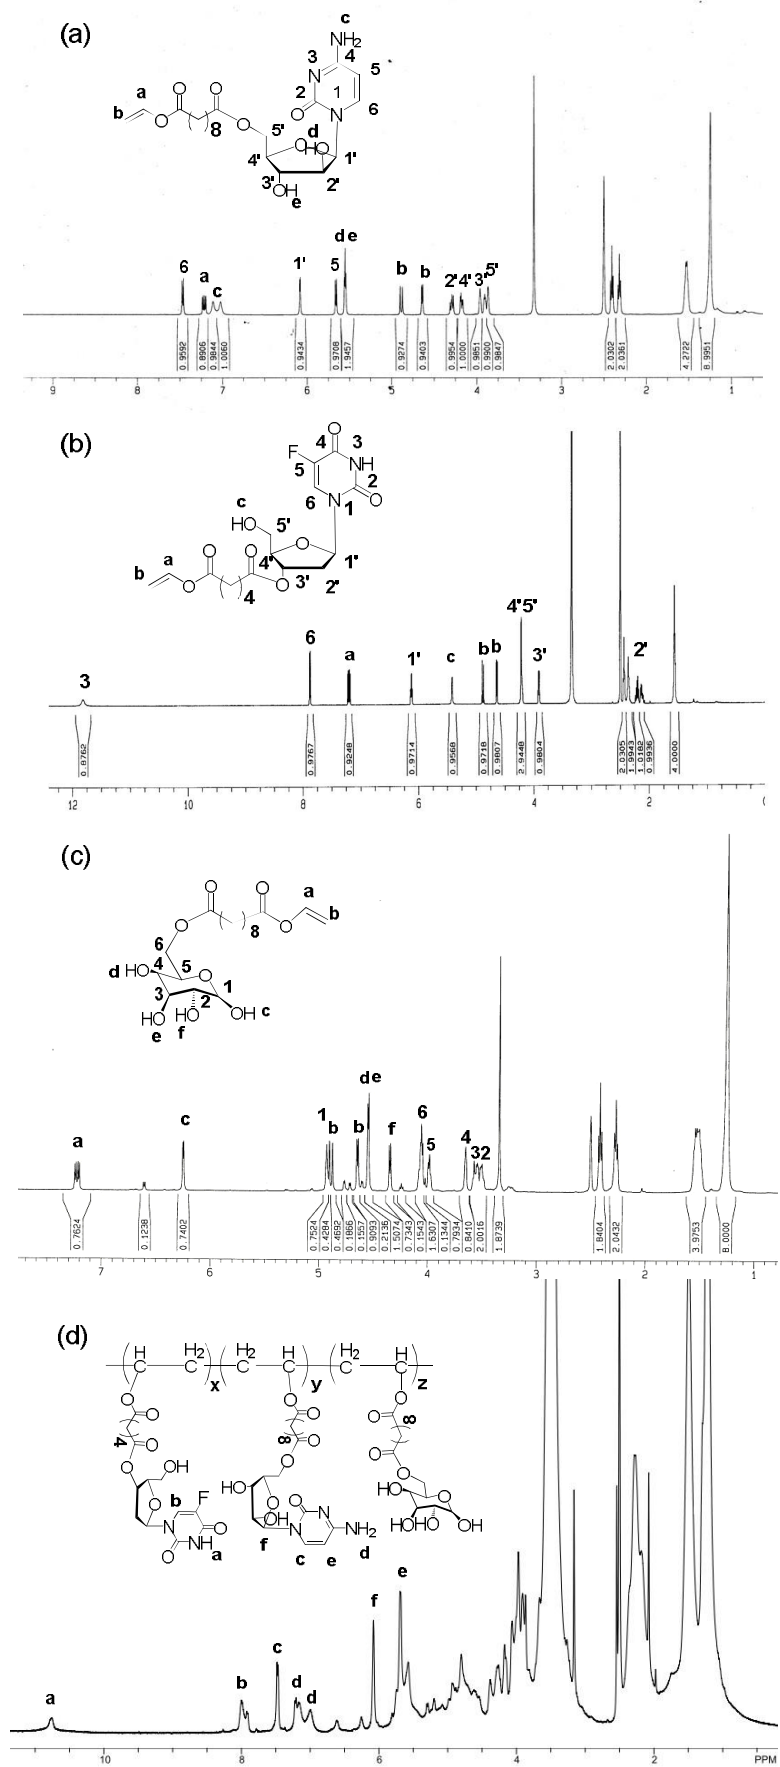

Fig. S2 <sup>1</sup>H NMR spectra of (a) VSC, (b) VAF, (c) VGA and (d) poly (VAF-co-VSC-co-VGA).
